# Supplementary material for: Chemical welding of binary nanoparticles: room temperature sintering of CuSe and In2S3 nanoparticles for solution-processed CuInSxSe1−x solar cells
Source: Royal Society of Chemistry journal article supplement (doi:10.1039/c3cc00022b), 2013-01-01
Supplement: c3cc00022b.pdf [file c3cc00022b.pdf]

## Chemical welding of binary nanoparticles: room temperature sintering of CuSe and $\text{In}_2\text{S}_3$ nanoparticles for solution-processed $\text{CuInS}_x\text{Se}_{1-x}$ solar cells

Hui Min Lim<sup>ab‡</sup>, Sudip K. Batabyal<sup>a‡</sup>, Stevin S. Pramana<sup>b</sup>, L. H. Wong<sup>ab</sup>, Shlomo Magdassi<sup>c\*</sup> and Subodh G. Mhaisalkar<sup>ab\*</sup>

10

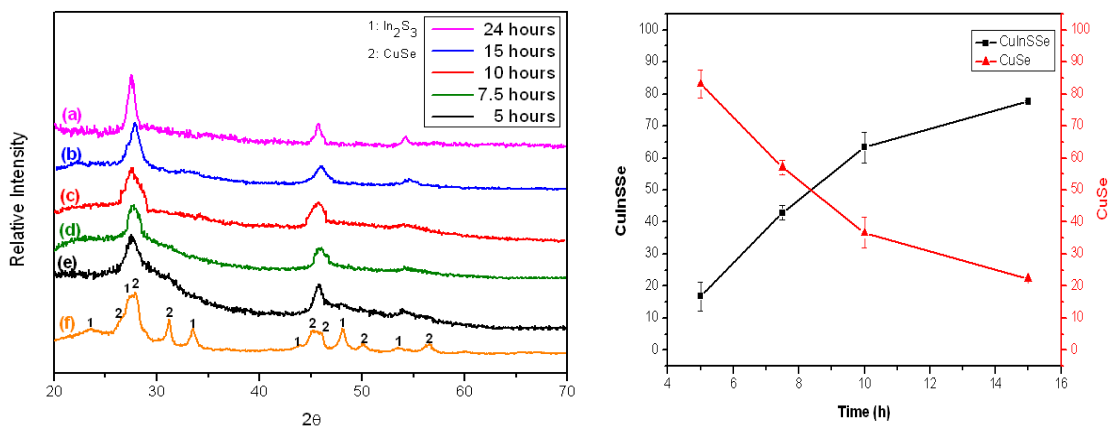

Figure S1: (a) XRD patterns of products after (a) 24hours, (b) 15 hours, (c) 10hours, (d) 7.5 hours, (e) 5 hours and (f) time 0h; (b) Quantitative Analysis - Rietveld refinement of products at different reaction times.

15

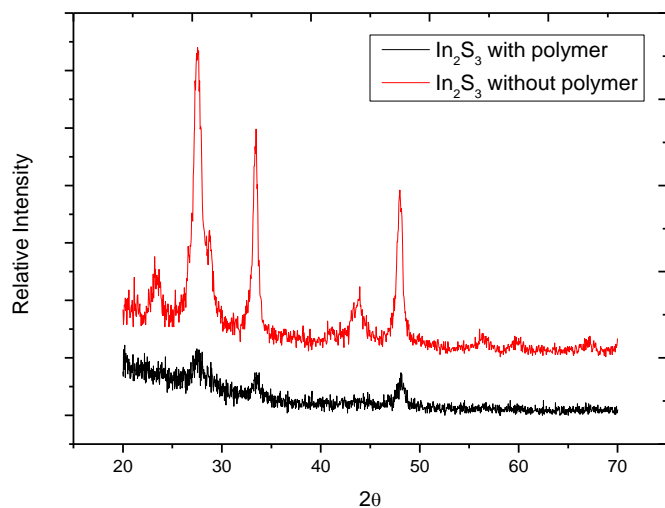

Figure S2: XRD pattern of  $\text{In}_2\text{S}_3$  with and without polymer (JCPDF\_025-0390)

20

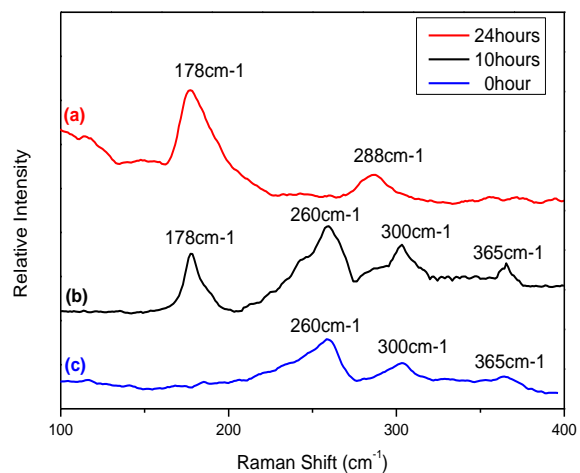

Figure S3: Raman spectra of products after (a) 24hours, (b) 10hours and (c) at time 0hour.

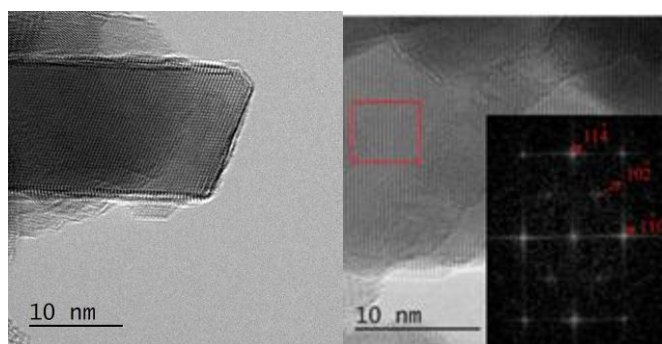

(a)

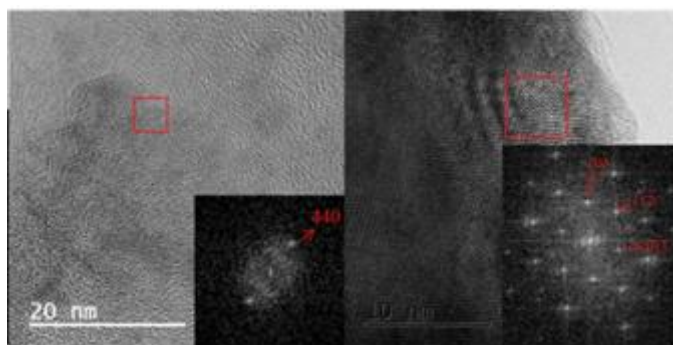

(b)

(c)

Figure S4: HRTEM images for (a) CuSe, (b) In<sub>2</sub>S<sub>3</sub> and (c) CuIn(S<sub>x</sub>Se<sub>1-x</sub>)<sub>2</sub>. Inserts are the FFT of the respective HRTEM of the samples.

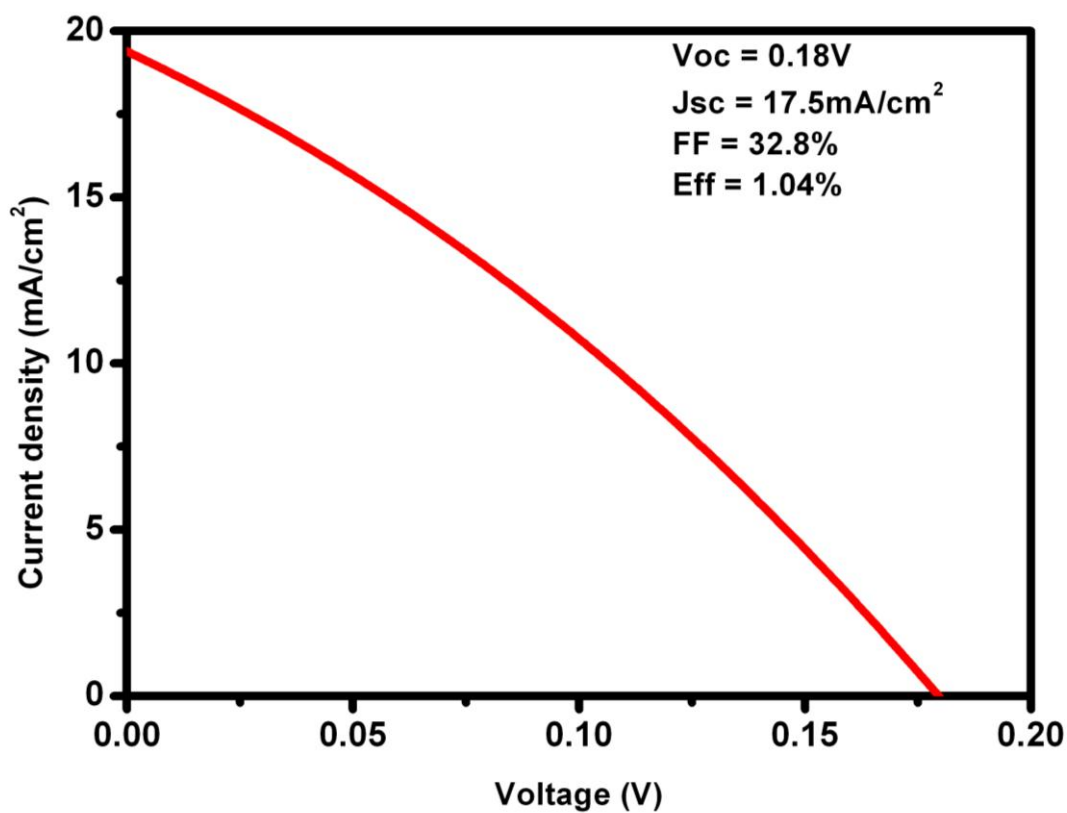

5  
Figure S5: Photovoltaic performance of  $\text{CuInS}_x\text{Se}_{1-x}$  device fabricated from coalesced particles.
